# Supplementary material
Source: publisher figshare collection journal article supplement (https://frontiersin.figshare.com/ndownloader/files/15428030)
Supplement: Supplementary file [file 15428030]

A

## shRNA KD efficiency in KGN

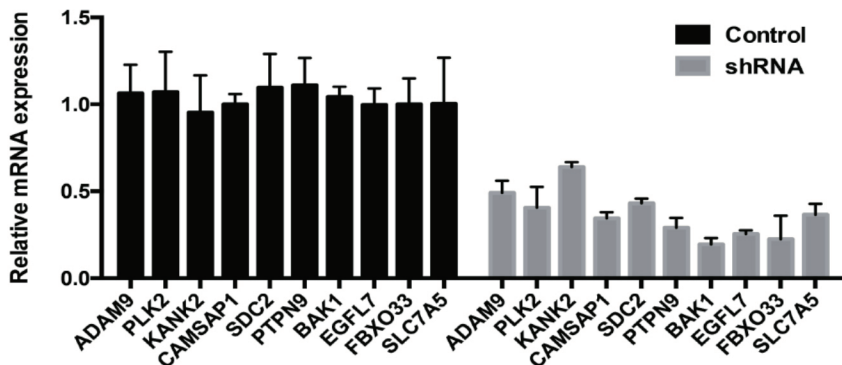

B

## Proliferation

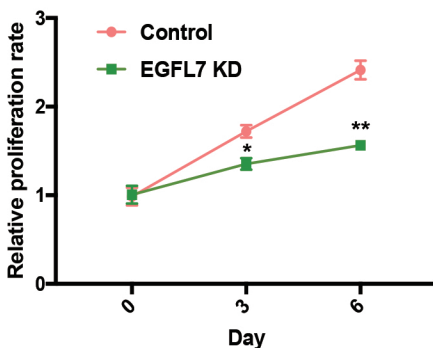

Supplementary figure 3. (A) The knockdown efficiency of all shRNAs in KGN cells. (B) The effects of EGFL7 KD on proliferation of KGN cells.

\* $P < 0.05$ , \*\* $P < 0.01$
